# Supplementary material for: Genomic characterization of novel IncFII-type multidrug resistant plasmids p0716-KPC and p12181-KPC from Klebsiella pneumoniae
Source: PubMed Central journal article supplement (PMC5517477; doi:10.1038/s41598-017-06283-z), 2017-07-19
Supplement: 41598_2017_6283_MOESM1_ESM.pdf [file 41598_2017_6283_MOESM1_ESM.pdf]

1

2

3

4 **Genomic characterization of novel IncFII-type multidrug resistant plasmids**  
5 **p0716-KPC and p12181-KPC from *Klebsiella pneumoniae***

6

7 Jiao Feng<sup>1</sup>, Zhe Yin<sup>1</sup>, Qiangyuan Zhao<sup>2</sup>, Yachao Zhao<sup>1</sup>, Defu Zhang<sup>1,4</sup>, Xiaoyuan Jiang<sup>1</sup>,  
8 Weili Wu<sup>3</sup>, Weijun Chen<sup>3</sup>, Hui Wang<sup>1</sup>, Yajun Song<sup>1</sup>, Yigang Tong<sup>1</sup>,  
9 Jingling Wang<sup>1</sup>, Yanjun Li<sup>2</sup>, Dongsheng Zhou<sup>1</sup>

10

11 *1, State Key Laboratory of Pathogen and Biosecurity, Beijing Institute of Microbiology*  
12 *and Epidemiology, Beijing 100071, China; 2, Laboratory Department, Navy General*  
13 *Hospital, Beijing 100048, China; 3, Beijing Institute of Genomics, Chinese Academy of*  
14 *Sciences, Beijing, 100029, China; 4, College of Food Science and Project Engineering,*  
15 *Bohai University, Jinzhou 121013, China*

16

17 **Short running title:** p0716-KPC and p12181-KPC from *K. pneumoniae*

18 Jiao Feng and Zhe Yin contributed equally to this work.

19

20 **Corresponding authors:**

21 **Dongsheng Zhou**, E-mail: dongshengzhou1977@gmail.com

22 **Yanjun Li**, E-mail: liyanjun1230@163.com

23 **Jinglin Wang**, E-mail: wjlwjl0801@sina.com

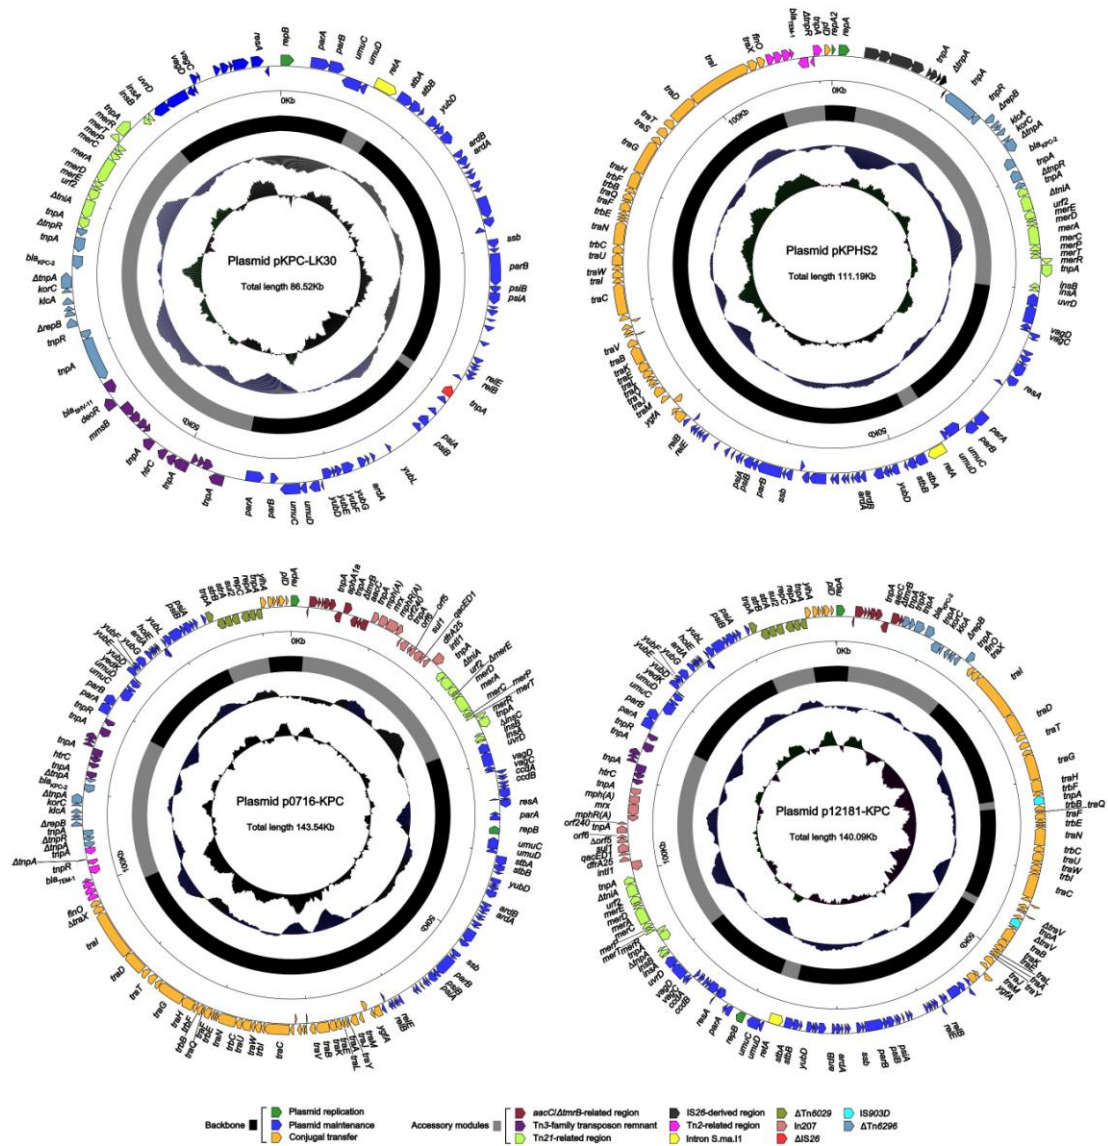

24

25 **Figure S1. Schematic maps of sequenced plasmids.** Genes are denoted by arrows  
 26 and are colored based on gene function classification. The innermost circle presents  
 27 GC-Skew [(G-C)/(G+C)] with a window size of 500 bp and a step size of 20 bp. The  
 28 following circle presents GC content. Backbone and accessory module regions are also  
 29 shown.
